# Supplementary material
Source: MDPI journal article supplement (https://www.mdpi.com/1424-2818/13/10/475)
Supplement: s1 [file s1]

Archive with 2 entries (2 files):
- SupplementalMaterial_Rev2_final.pdf
- Supplymental Figure Rev.pdf
